# Supplementary material
Source: PubMed Central journal article supplement (PMC404073)

**a**

WT

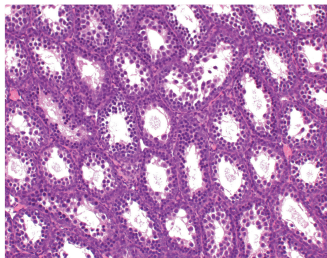

G4

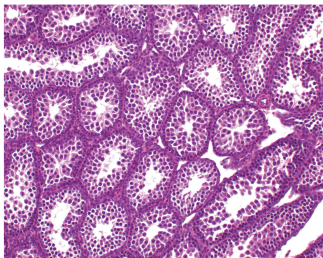**b**

WT

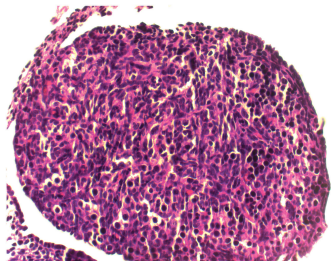

G2

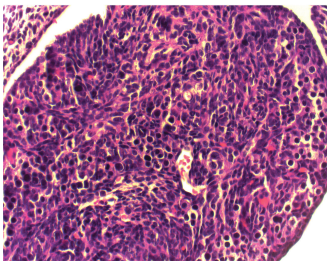

G4

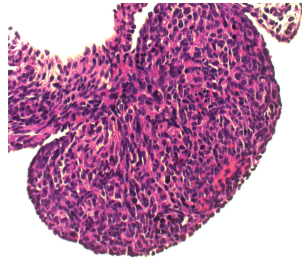

Supplement: pnas_101_17_6496__1.pdf [file pnas_101_17_6496__1.pdf]
